# Supplementary material for: The tails of apical scaffolding proteins EBP50 and E3KARP regulate their localization and dynamics
Source: PubMed Central journal article supplement — Mol Biol Cell. 2013 Nov 1;24(21):3381–92. doi: 10.1091/mbc.E13-06-0330 (PMC3814156; doi:10.1091/mbc.e13-06-0330), 2013-11-01

# Supplemental Materials

*Molecular Biology of the Cell*

Garbett et al.

**Figure S1.** Deletion of regions in the tail of EBP50 does not alter its localization. Maximum projections of JEG-3 cells expressing GFP-tagged EBP50 deletion mutants indicated (green) and stained for ezrin (red) and actin (blue). Bars, 10 $\mu$ m.

**Figure S2.** The tails of EBP50 and E3KARP localize similarly to their respective full-length counterparts. (A) Representative maximum projection images of JEG-3 cells expressing GFP-tagged EBP50(242-358), or E3KARP(239-337). GFP signal is shown in green and ezrin staining in red. Bars, 10 $\mu$ m. (B) Highly magnified regions of microvilli (*top*) containing GFP-tagged EBP50(242-358), or E3KARP(239-337), and stained for ezrin (red). Bars, 2 $\mu$ m. (*bottom*) Graphs of normalized intensity of ezrin (red) and GFP (green) of multiple microvilli ( $n \geq 5$ ) were plotted (open circles) as a function of the percent of the total microvillar length with 0 and 100 percent representing the tip and base respectively. The data was fit to a LOWESS function shown as a solid line. (C) The LOWESS function fits of EBP50 full-length (purple) and EBP50(242-358) (cyan) show nearly identical distributions along microvilli. (D) The LOWESS function fits of E3KARP full-length (purple) and E3KARP(239-337) (cyan) show similar distributions along microvilli.

Figure S1

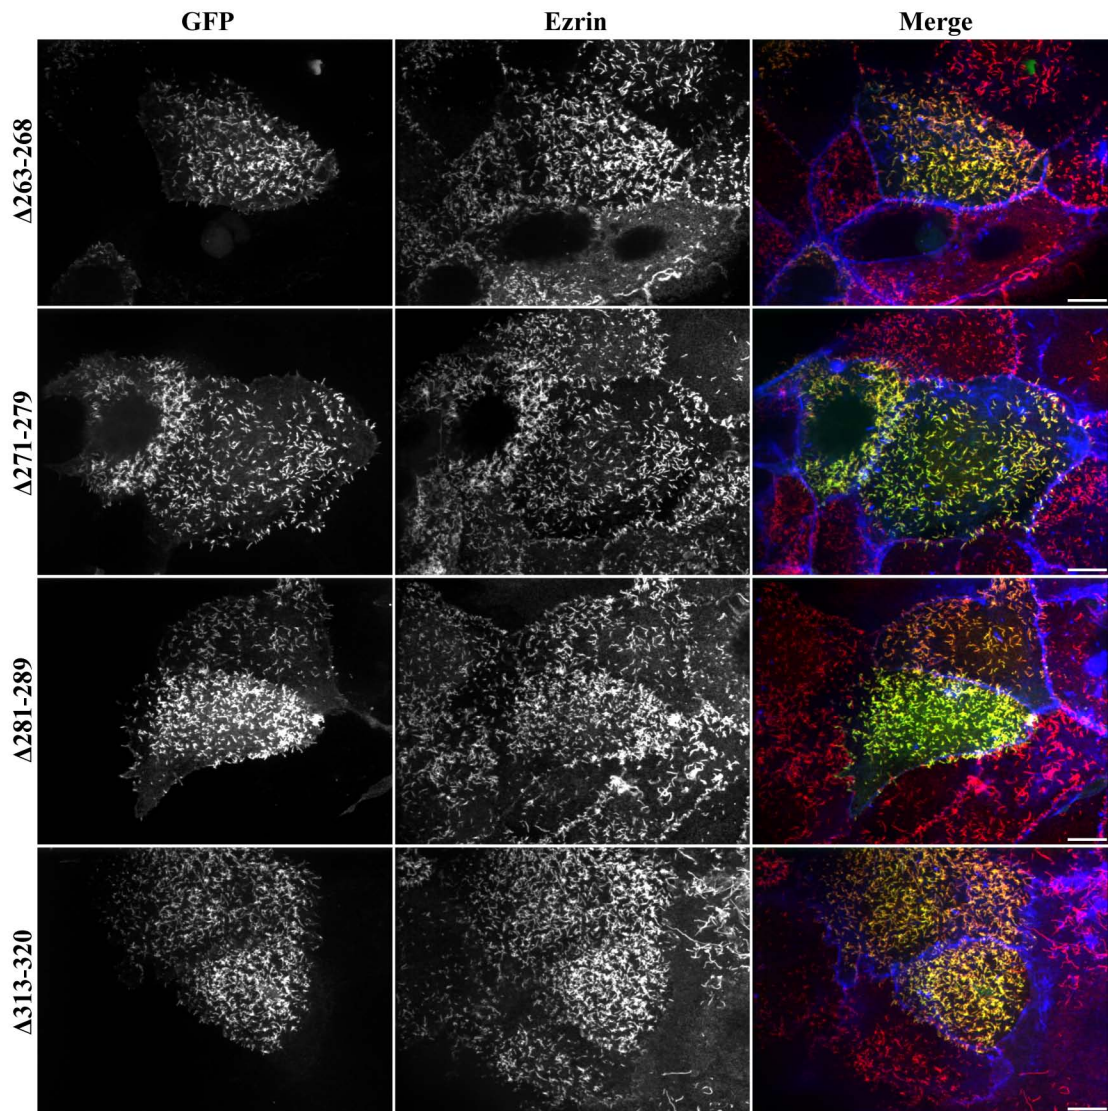

Figure S2

**A**

GFP

Ezrin

Merge

EBP50 (242-358)

E3KARP(239-337)

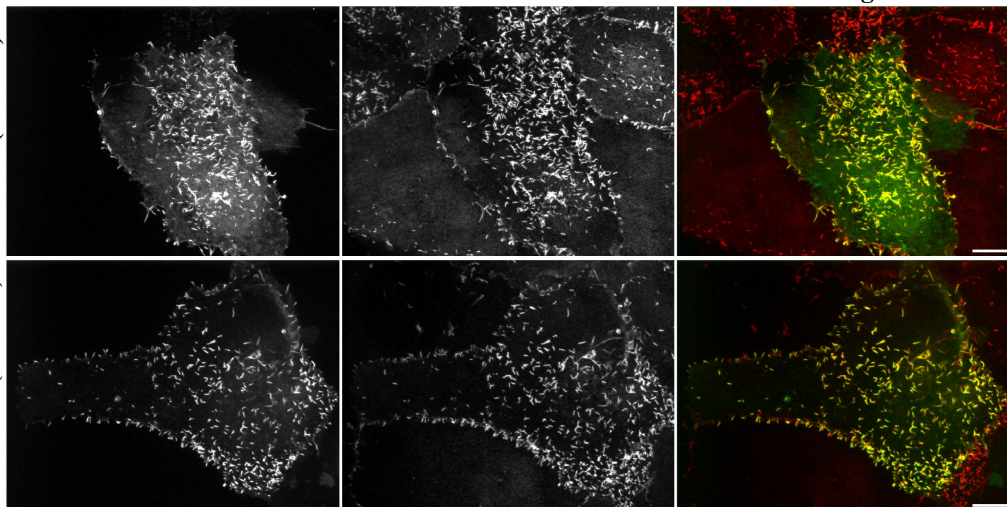

**B**

EBP50(242-358)

E3KARP(239-337)

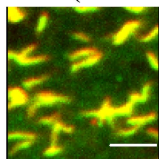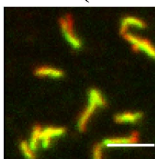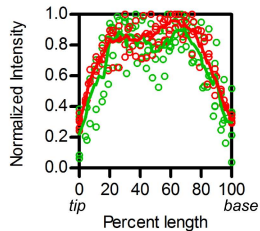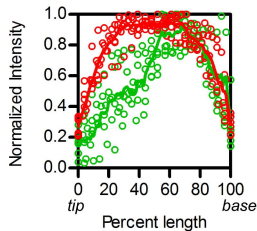

■ Ezrin ■ GFP

**C**

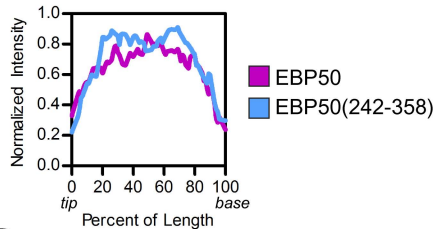

**D**

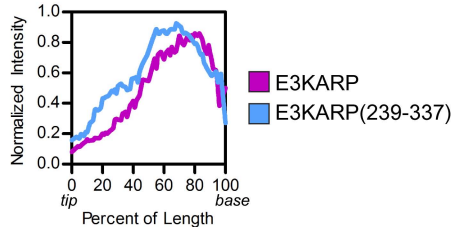

Supplement: supp_E13-06-0330v1_CombinedSupMats.pdf [file supp_E13-06-0330v1_CombinedSupMats.pdf]
